# Supplementary material
Source: publisher figshare collection journal article supplement (https://frontiersin.figshare.com/ndownloader/files/29090319)
Supplement: Supplementary file [file 29090319]

Supplementary Figure 2

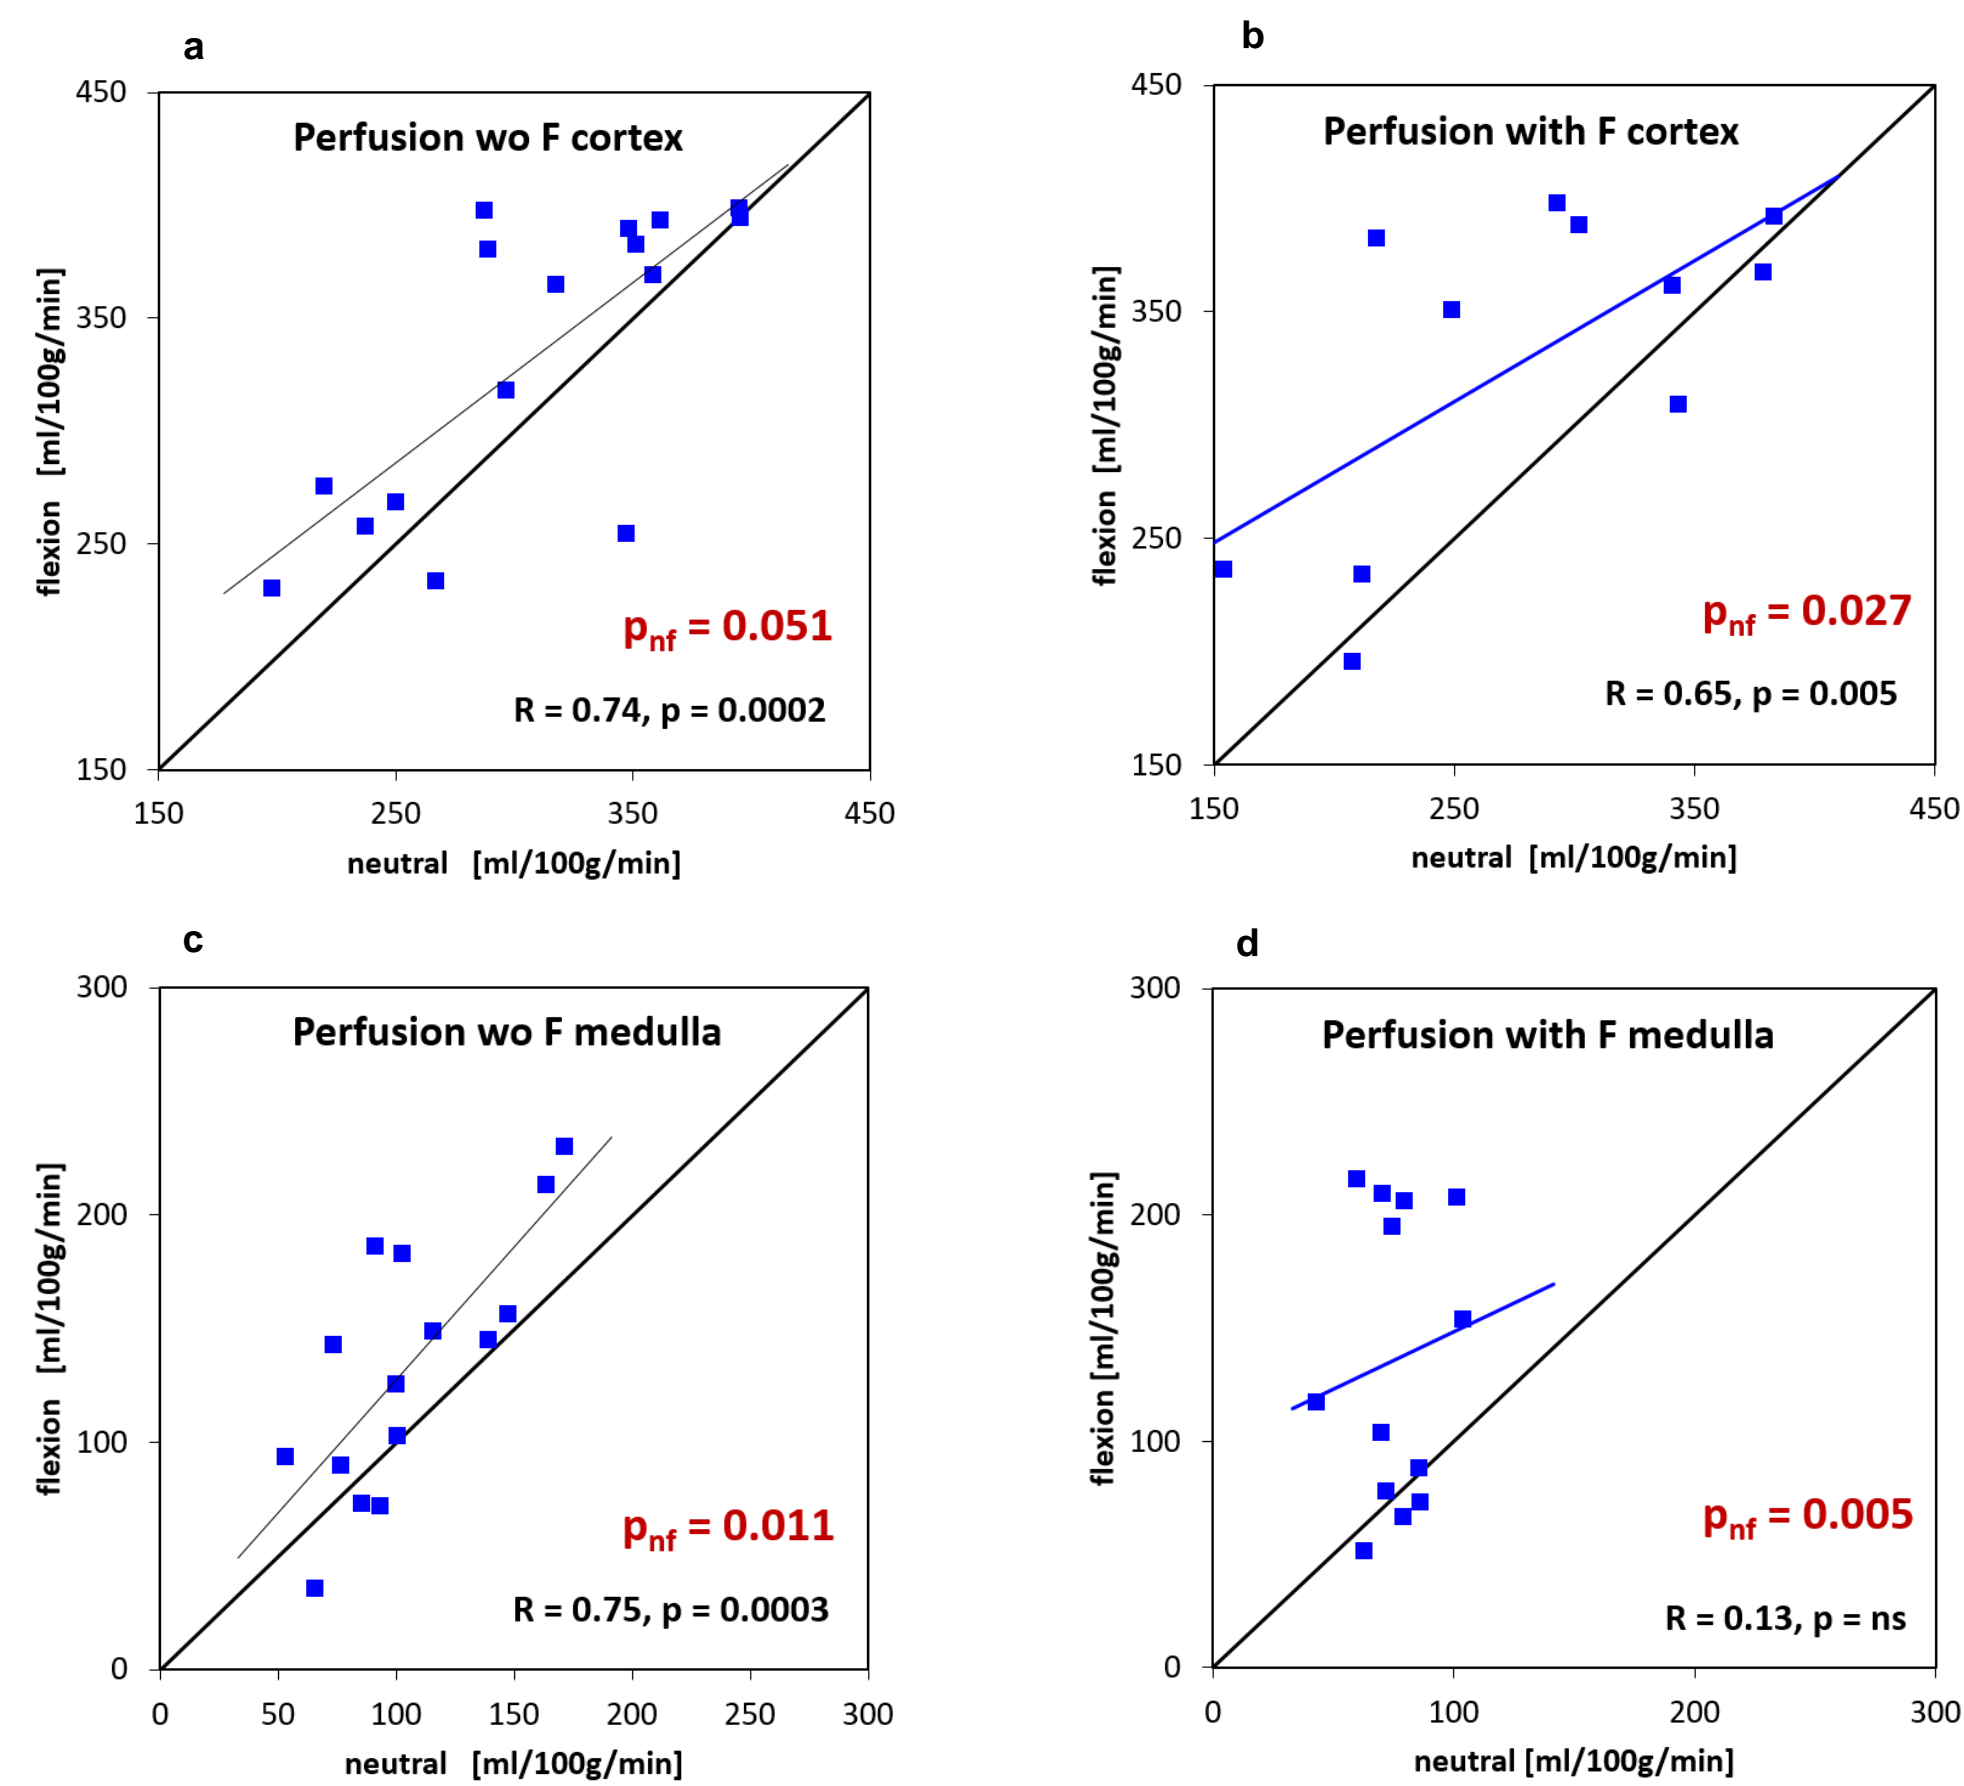

**Supplementary Figure 2 a-d. Arterial spin labeling-MRI during neutral and flexed hip position.** Perfusion values measured in cortex (a, b) and medulla (c, d) without (wo) (a, c) and after (b, d) furosemide (F) administration.  $p_{nf}$  (p-value for comparison of neutral and flexed hip position, students t-test); R (Pearson correlation coefficient); p (p-value for correlation of neutral and flexed hip position), ns (not significant).
